# Supplementary material
Source: publisher figshare collection journal article supplement (https://asha.figshare.com/articles/dataset/_/17155934)
Supplement: Supplementary file 1 [file 1]

## Supplemental Material S2. Participants' characteristics and testing environments.

| Group | Adults (> 18 years)                                        | Children (< 18 years)                                         | Children's testing site                                                                 | Total           |
|-------|------------------------------------------------------------|---------------------------------------------------------------|-----------------------------------------------------------------------------------------|-----------------|
| SC    | 0                                                          | 30 children (age range = 11.6–16.5, $M = 14.0$ , $SD = 1.5$ ) | 1 state secondary school in North London                                                | 30              |
| RL    | 11 adults (age range: 19.4–25.1, $M = 21.1$ , $SD = 1.8$ ) | 43 children (age range: 4.9–15.9, $M = 11.3$ , $SD = 3.8$ )   | 2 state primary schools in North London<br><br>1 secondary school in South East England | 54              |
| GY*   | 0 adults                                                   | 17 children (age range: 6.9–17, $M = 10.9$ , $SD = 3.5$ )     | Recruited widely from the UK                                                            | 17              |
| HR    | 3 adults (age range: 19.0–24.9, mean = 22.0, $SD = 3.9$ )  | 14 children (age range: 5.4–11.1, $M = 8.4$ , $SD = 1.9$ )    | 1 state primary school in Devon<br>1 private primary school in London                   | 17              |
| HW    | 0 adults                                                   | 18 children (age range: 6.4–7.3, $M = 6.8$ , $SD = 0.3$ )     | 1 primary school in North London                                                        | 16 (2 excluded) |
| CR    | 0 adults                                                   | 19 children (age range: 6.3–10.8, $M = 9.0$ , $SD = 1.7$ )    | South London primary schools                                                            | 19              |
| Total |                                                            |                                                               |                                                                                         | 153             |

\*Participants in the GY group were control participants recruited as part of a study of children with developmental language disorder. See Baird et al. (2011) and Loucas et al. (2016) for full details.

## References

- Baird, G., Slonims, V., Simonoff, E., & Dworzynski, K. (2011). Impairment in non-word repetition: A marker for language impairment or reading impairment? *Developmental Medicine and Child Neurology*, 53(8), 711–716. <https://doi.org/10.1111/j.1469-8749.2011.03936.x>
- Loucas, T., Baird, G., Simonoff, E., & Slonims, V. (2016). Phonological processing in children with specific language impairment with and without reading difficulties. *International Journal of Language & Communication Disorders*, 51(5), 581–588. <https://doi.org/10.1111/1460-6984.12225>
