# Supplementary material
Source: publisher figshare collection journal article supplement (https://asha.figshare.com/articles/dataset/_/17155934)
Supplement: Supplementary file 2 [file 1]

**Supplemental Material S1.** Full list of targets and foils for the familiarization and testing phase. AoA = age of acquisition; SAM-PA = SAM-PA machine readable IPA transcription; Feature = phonological feature change; SNR = signal-to-noise ratio adjustment for each word.

| Orthographic           | Target<br>IPA | AoA  | SNR | Foil 1 (distracter)<br>IPA | Feature | Foil 2 (distracter)<br>IPA | Feature |
|------------------------|---------------|------|-----|----------------------------|---------|----------------------------|---------|
| <b>Familiarization</b> |               |      |     |                            |         |                            |         |
| Bike                   | baɪk          | 4.79 | 2   | waɪk                       | Manner  | gaɪk                       | Place   |
| Bin                    | bɪn           | 4.68 | 3   | mɪn                        | Manner  | ɡɪn                        | Place   |
| Bus                    | bʌs           | 3.85 | -4  | wʌs                        | Manner  | dʌs                        | Place   |
| Dog                    | dɒɡ           | 2.80 | 2   | nɒɡ                        | Manner  | ɡɒɡ                        | Place   |
| Doll                   | dɒl           | 3.68 | 0   | ɹɒl                        | Manner  | bɒl                        | Place   |
| Duck                   | dʌk           | 3.50 | -4  | zʌk                        | Manner  | ɡʌk                        | Place   |
| Laugh                  | lɑ:f          | 3.79 | -2  | zɑ:f                       | Manner  | wɑ:f                       | Place   |
| Leg                    | leg           | 3.00 | -1  | deg                        | Manner  | jeg                        | Place   |
| One                    | wʌn           | 3.23 | -3  | mʌn                        | Manner  | lʌn                        | Place   |
| Rain                   | ɹeɪn          | 3.60 | 0   | neɪn                       | Manner  | jeɪn                       | Place   |
| Sea                    | si:           | 4.74 | -7  | zi:                        | Voicing | θi:                        | Place   |
| Sun                    | sʌn           | 3.40 | 11  | zʌn                        | Voicing | θʌn                        | Place   |
| Watch                  | wɒtʃ          | 4.33 | -3  | ɡɒtʃ                       | Manner  | ɹɒtʃ                       | Place   |
| Wave                   | weɪv          | 4.26 | -1  | beɪv                       | Manner  | leɪv                       | Place   |
| <b>Test items</b>      |               |      |     |                            |         |                            |         |
| Bed                    | bed           | 2.89 | -3  | med                        | Manner  | ped                        | Voicing |
| Book                   | bʊk           | 3.68 | 0   | wʊk                        | Manner  | pʊk                        | Voicing |
| Boot                   | bu:t          | 3.89 | 5   | wu:t                       | Manner  | pu:t                       | Voicing |
| Chair                  | tʃeə          | 3.43 | 0   | seə                        | Manner  | dʒeə                       | Voicing |
| Boat                   | bəʊt          | 3.84 | -1  | wəʊt                       | Manner  | pəʊt                       | Voicing |
| Bag                    | bæg           | 4.28 | -3  | mæg                        | Manner  | pæg                        | Voicing |
| Dig                    | dɪɡ           | 4.19 | -3  | nɪɡ                        | Manner  | tɪɡ                        | Voicing |
| Towel                  | taʊl          | 3.22 | -5  | saul                       | Manner  | paul                       | Place   |
| Sing                   | sɪŋ           | 3.47 | -13 | tɪŋ                        | Manner  | ʃɪŋ                        | Place   |
| Knife                  | naɪf          | 4.15 | 0   | daɪf                       | Manner  | maɪf                       | Place   |
| Wash                   | wɒʃ           | 4.00 | -5  | bɒʃ                        | Manner  | ɹɒʃ                        | Place   |
| Bath                   | bɑ:θ          | 3.23 | -4  | wɑ:θ                       | Manner  | dɑ:θ                       | Place   |
| Leaf                   | li:f          | 4.60 | 2   | ni:f                       | Manner  | wi:f                       | Place   |
| Road                   | ɹəʊd          | 4.55 | -2  | zəʊd                       | Manner  | jəʊd                       | Place   |
| Cough                  | kɒf           | 4.32 | 18  | pɒf                        | Place   | ɡɒf                        | Voicing |
| Bite                   | baɪt          | 3.58 | -5  | daɪt                       | Place   | paɪt                       | Voicing |
| Comb                   | kəʊm          | 5.50 | 9   | pəʊm                       | Place   | ɡəʊm                       | Voicing |
| Kite                   | kaɪt          | 4.58 | 5   | paɪt                       | Place   | ɡaɪt                       | Voicing |
| Cow                    | kaʊ           | 3.94 | 0   | taʊ                        | Place   | ɡaʊ                        | Voicing |
| Cake                   | keɪk          | 3.26 | 3   | peɪk                       | Place   | geɪk                       | Voicing |
| Fish                   | fɪʃ           | 4.05 | 1   | hɪʃ                        | Place   | vɪʃ                        | Voicing |

|       |      |      |    |      |       |      |         |
|-------|------|------|----|------|-------|------|---------|
| Fork  | fɔ:k | 3.63 | 4  | sɔ:k | Place | vɔ:k | Voicing |
| Five  | faɪv | 4.51 | 4  | ʃaɪv | Place | vaɪv | Voicing |
| Fall  | fɔ:l | 4.71 | 0  | sɔ:l | Place | vɔ:l | Voicing |
| Soap  | səʊp | 3.17 | 2  | fəʊp | Place | zəʊp | Voicing |
| Foot  | fʊt  | 3.44 | 4  | hʊt  | Place | vʊt  | Voicing |
| Suck  | sʌk  | 5.58 | -8 | hʌk  | Place | zʌk  | Voicing |
| Thumb | θʌm  | 4.42 | 3  | ʃʌm  | Place | ðʌm  | Voicing |
